# Supplementary material for: Engineered Bacteria EcN-MT Alleviate Liver Injury in Cadmium-Exposed Mice via its Probiotics Characteristics and Expressing of Metallothionein
Source: PubMed Central journal article supplement (PMC8908209; doi:10.3389/fphar.2022.857869), 2022-02-24

**Supplementary Table 1**

| protein           | Product Catalog | brand                     | dilution ratio |
|-------------------|-----------------|---------------------------|----------------|
| GAPDH             | 5174            | Cell Signaling Technology | 1:5000         |
| $\alpha$ -SMA     | 14395-1-AP      | Proteintech               | 1:2000         |
| $\beta$ -actin    | 66009-1-Ig      | Proteintech               | 1:5000         |
| TLR4              | 19811-1-AP      | Proteintech               | 1:2000         |
| MyD88             | 66660-1-Ig      | Proteintech               | 1:5000         |
| NF- $\kappa$ B    | 10745-1-AP      | Proteintech               | 1:2000         |
| p-NF- $\kappa$ B  | AF2006          | Affinity                  | 1:2000         |
| Bax               | 50599-2-Ig      | Proteintech               | 1:5000         |
| Bcl-2             | 12789-1-AP      | Proteintech               | 1:5000         |
| Cleaved Caspase-3 | 9661S           | Cell Signaling Technology | 1:1000         |
| Occludin          | 27260-1-AP      | Proteintech               | 1:5000         |

**Supplementary Table 2**

| cytokines    | forward prime Sequences     | reverse prime Sequences     |
|--------------|-----------------------------|-----------------------------|
| GAPDH        | 5'-AGCCAAAAGGGTCATCATCT-3'  | 5'-GGGGCCATCCACAGTCTTCT-3'  |
| IL-1 $\beta$ | 5'-GTGTCTTTCCCGTGGACCTTC-3' | 5'-TCATCTCGGAGCCTGTAGTGC-3' |
| IL-6         | 5'-GAAATCGTGAAATGAG-3'      | 5'-GCTTAGGCATAACGCACT-3'    |
| TNF $\alpha$ | 5'-GTGGAAGTGGCAGAAGAGGCA-3' | 5'-AGAGGGAGGCCATTTGGGAAC-3' |

**Supplementary Fig. 1**

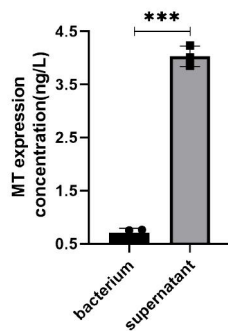

**Supplementary Fig. 2**

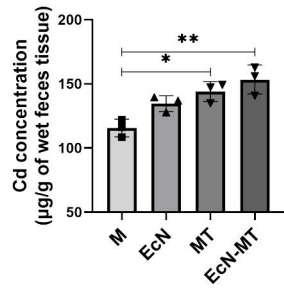

**Supplementary Fig. 3**

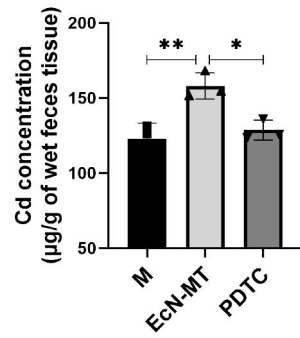

Supplement: DataSheet1.pdf [file DataSheet1.pdf]
